# Supplementary material
Source: Springer Nature journal article supplement (https://www.springermedizin.de/resource/supplementary/12913_2013_3381_MOESM2_ESM.pdf/9532636)

# Cost effectiveness plane

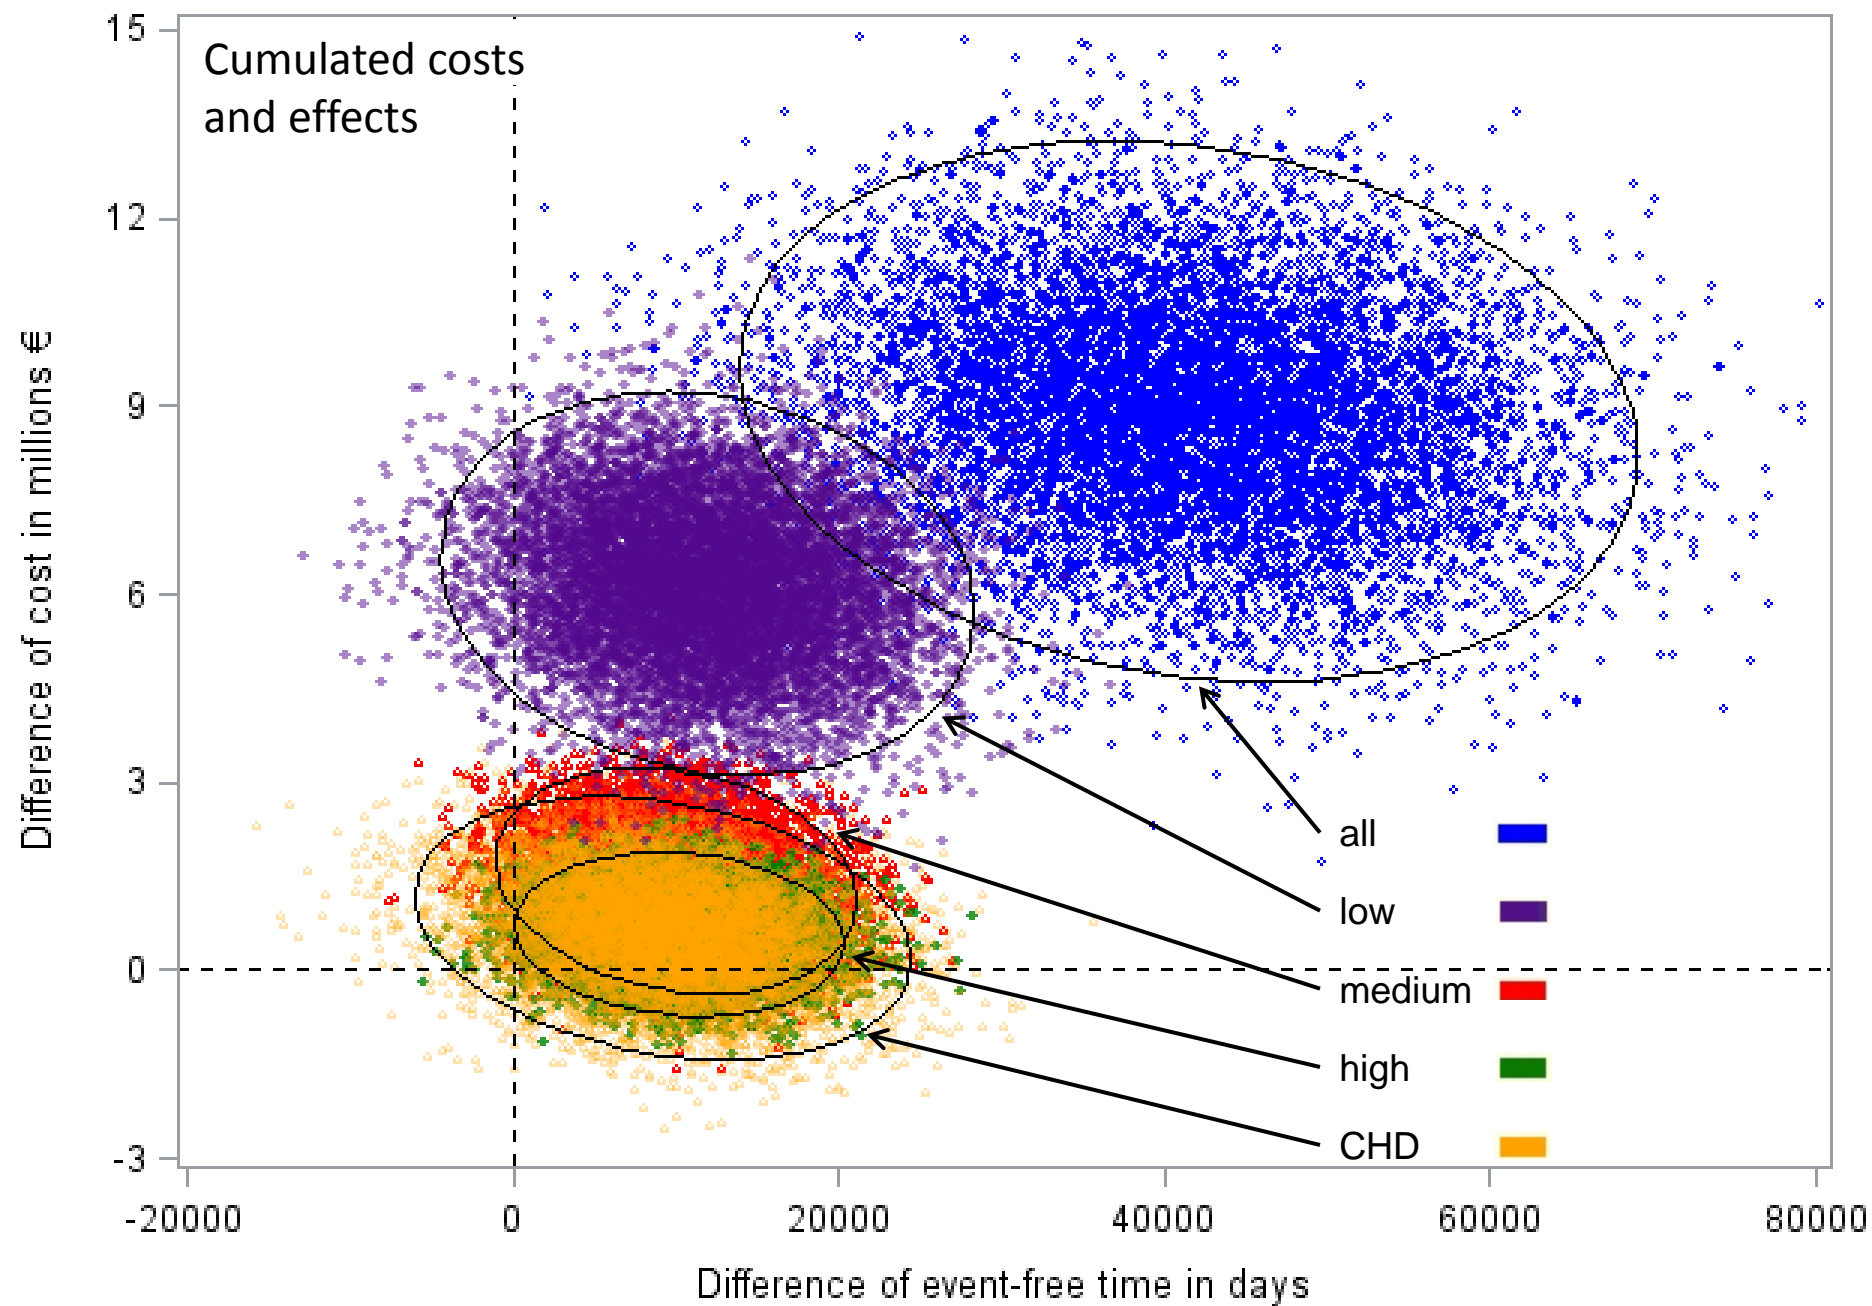

# Cost effectiveness plane

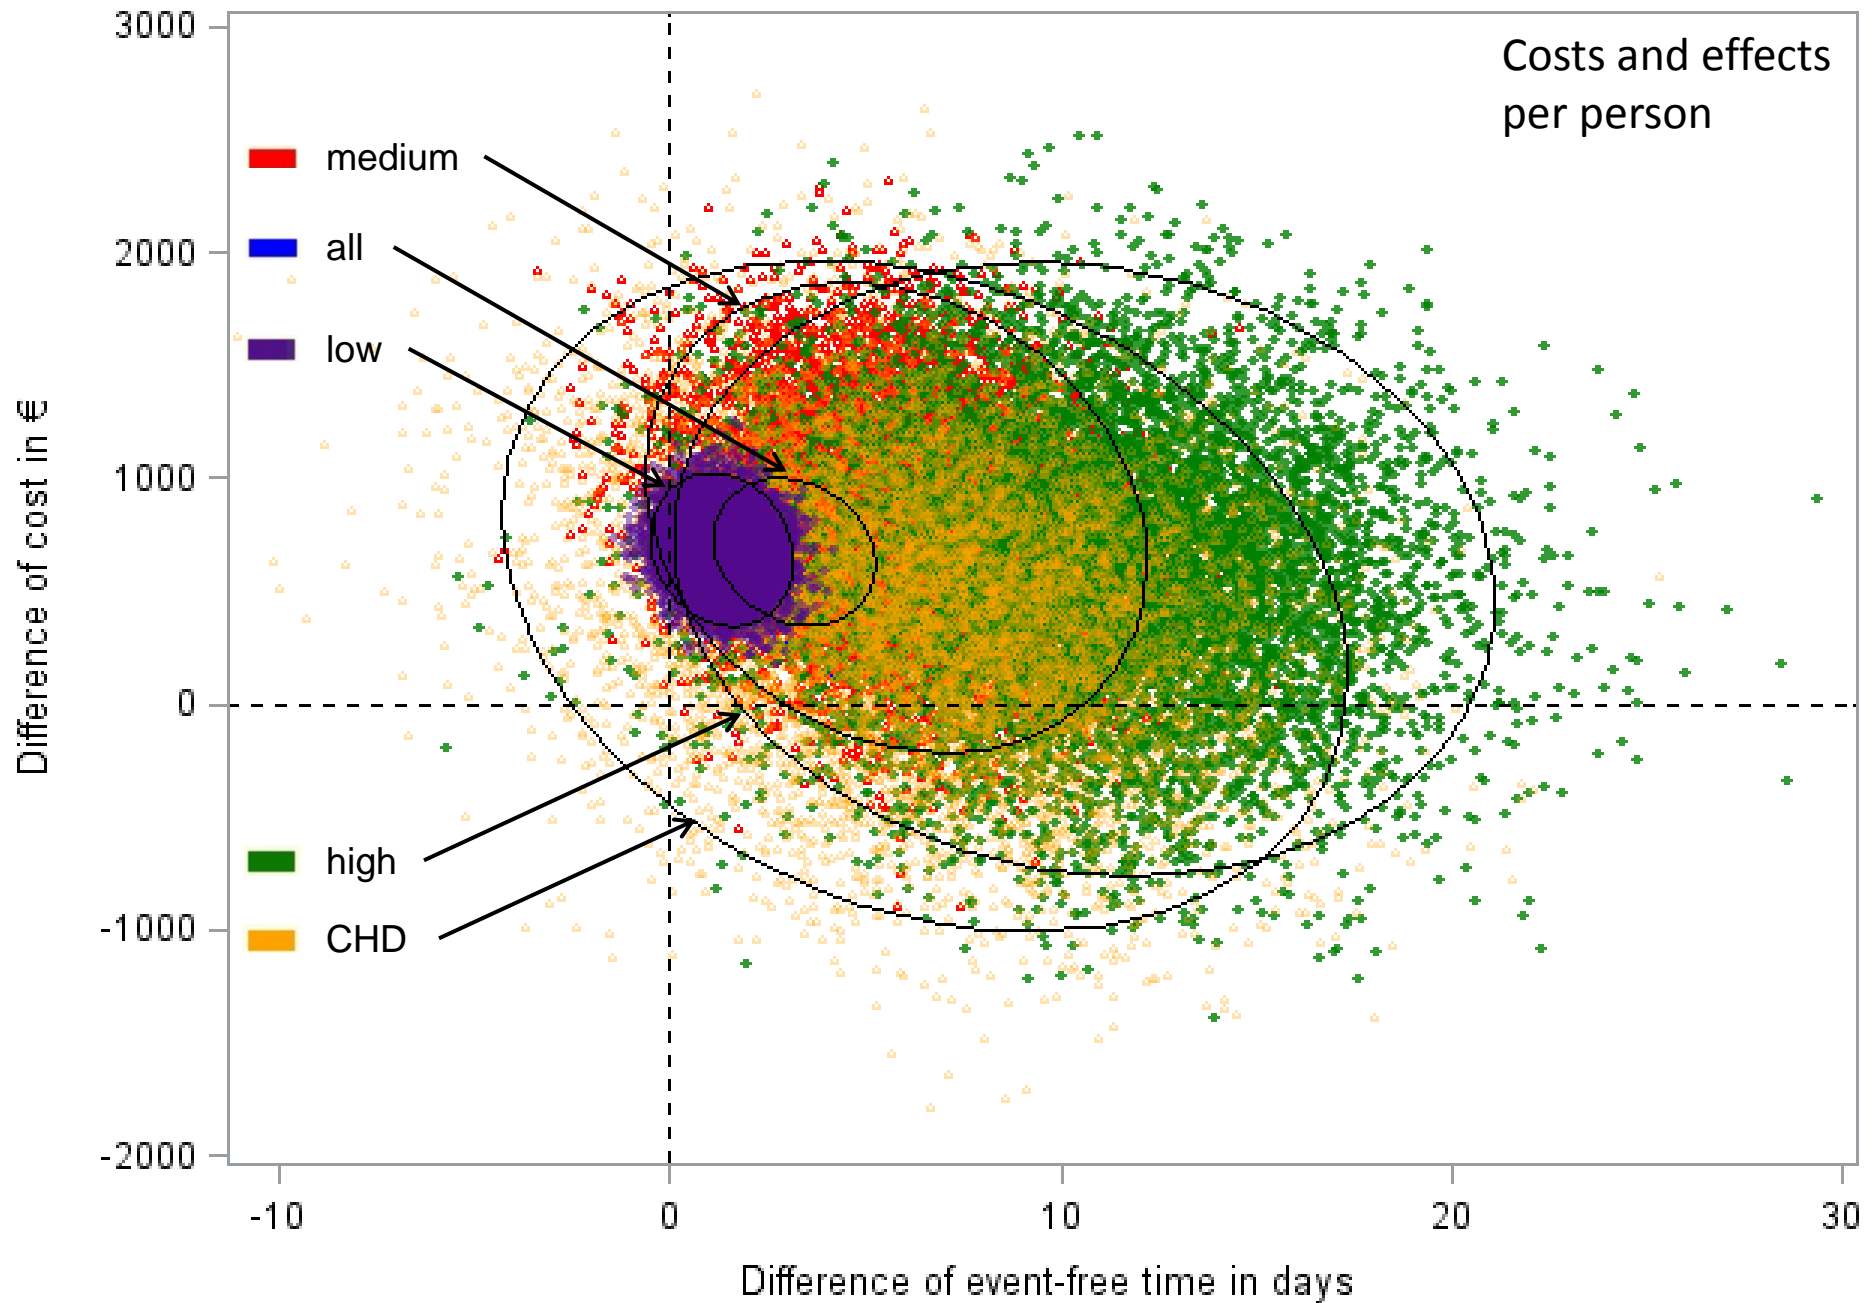

# Cost effectiveness plane

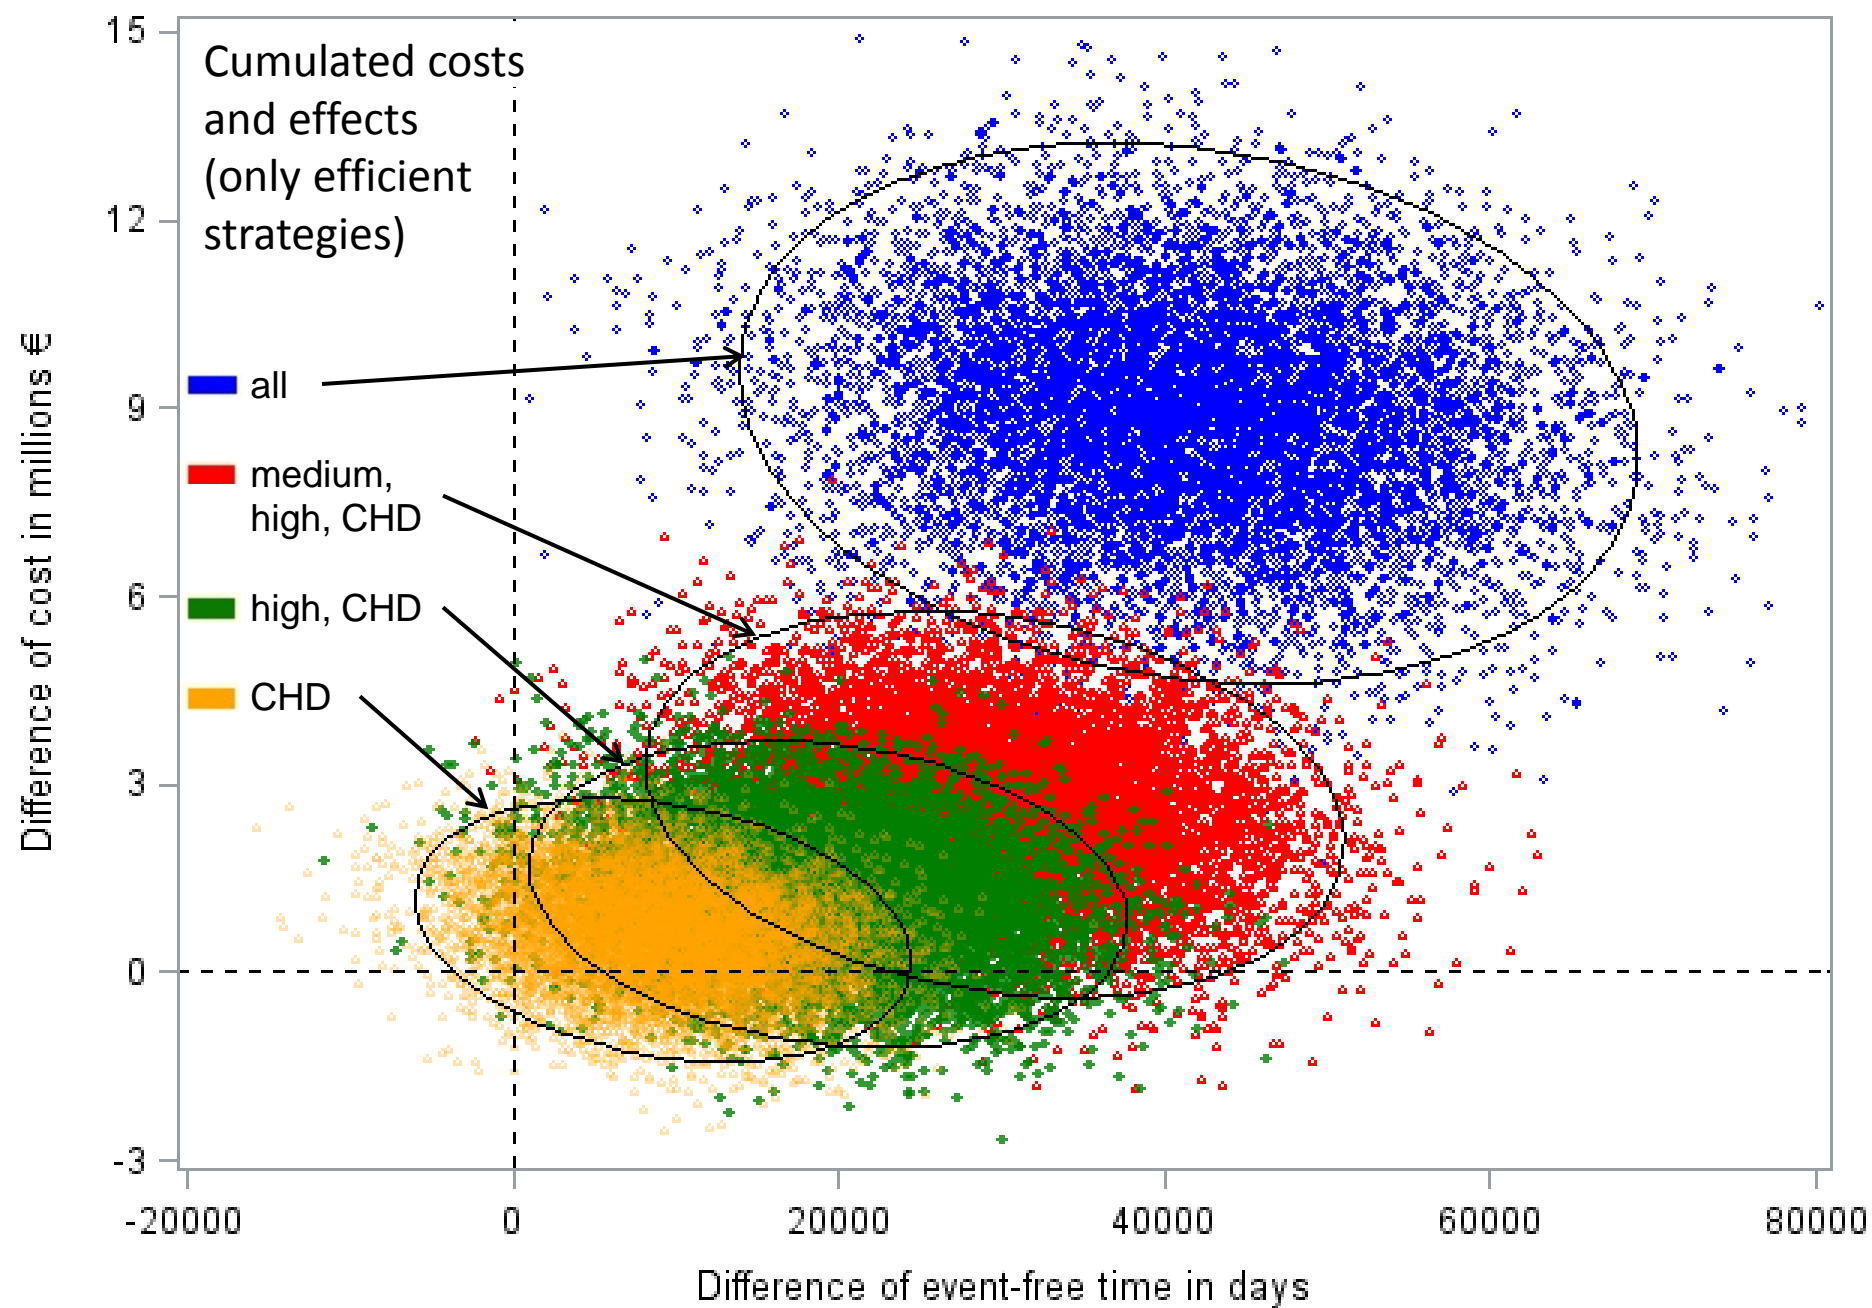

# Cost effectiveness plane

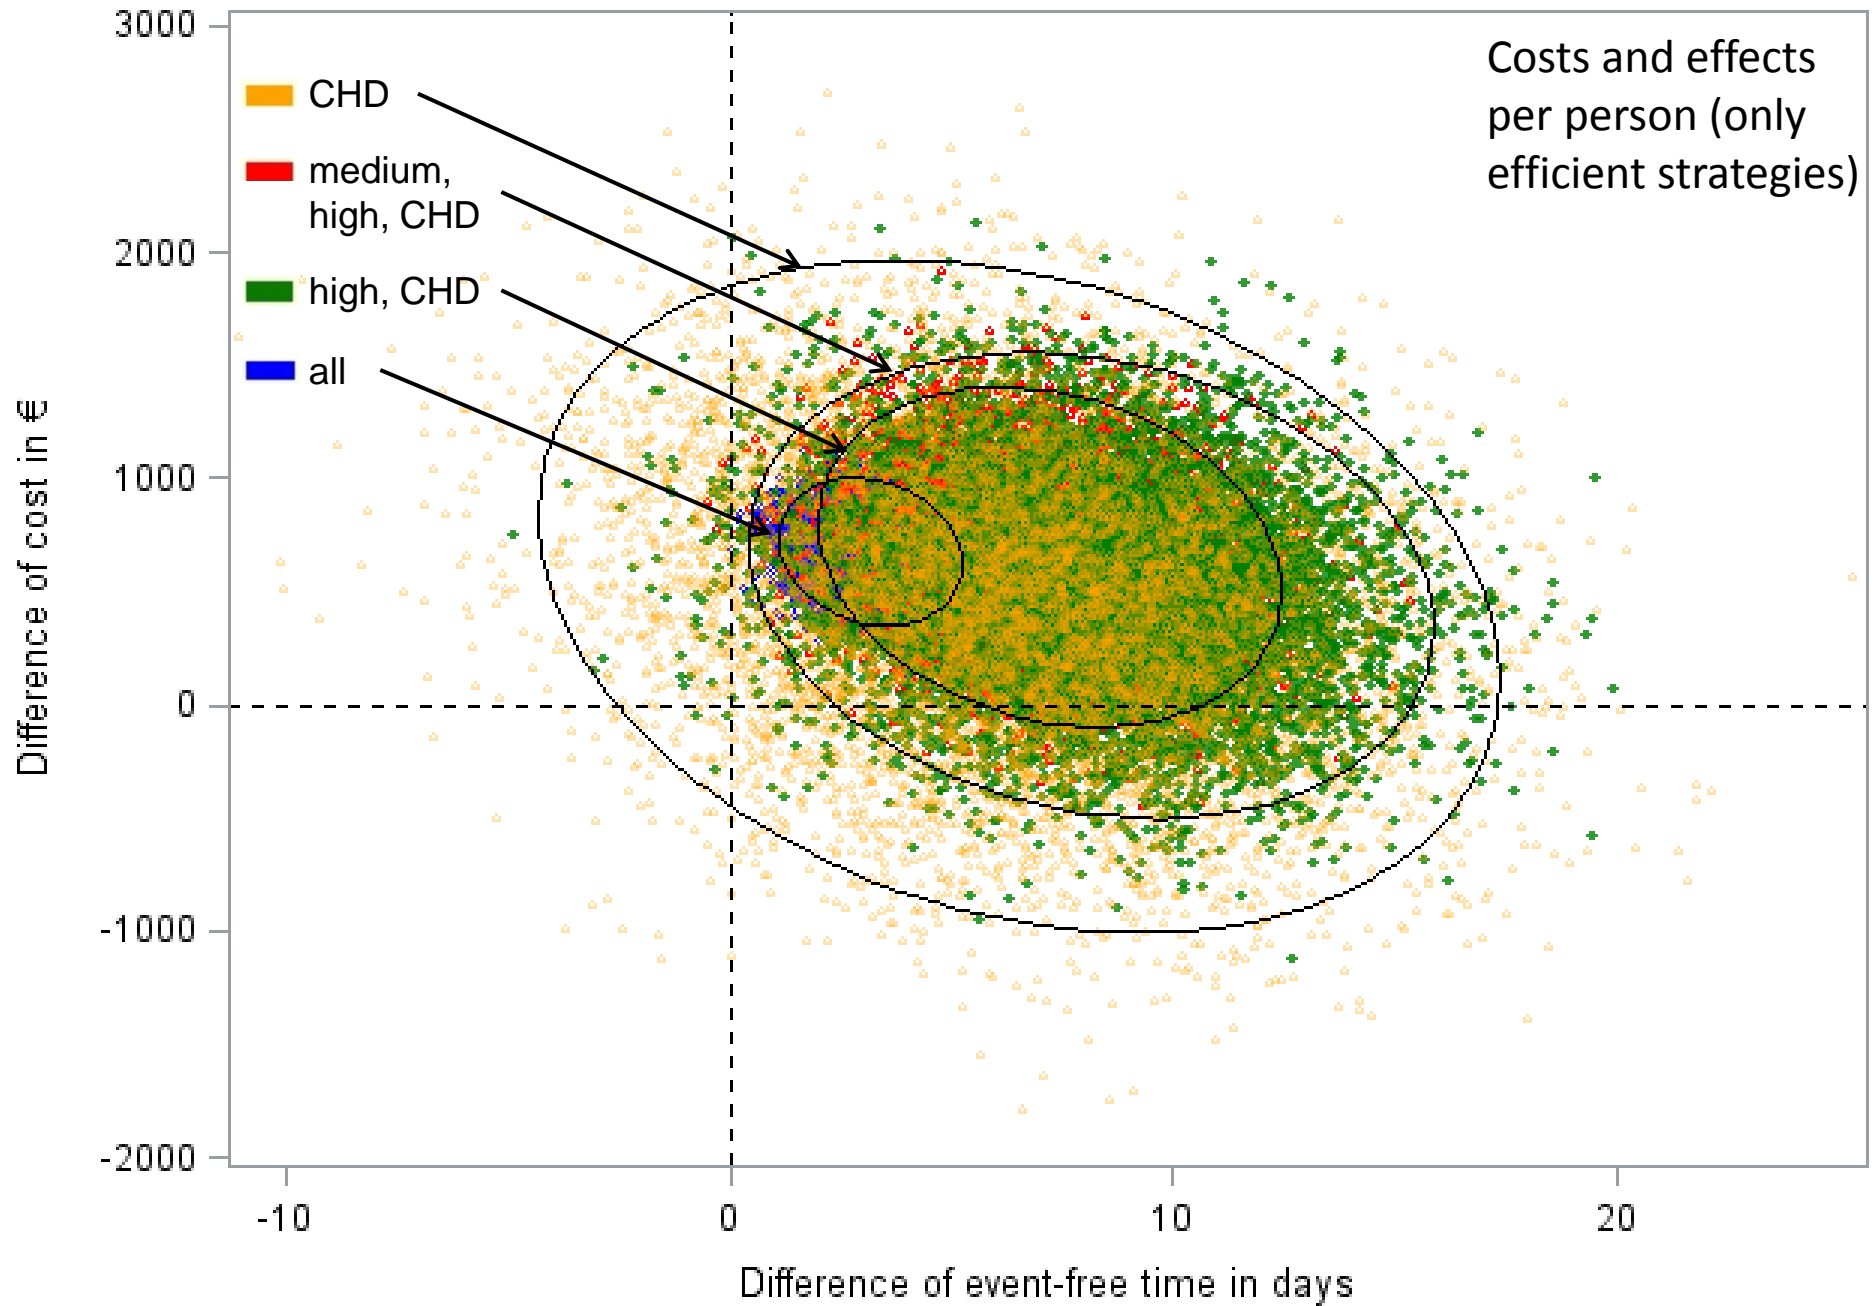

Supplement: MOESM2 [file 9532636]
